RESEARCH ARTICLE

# The *MGMT* promoter single-nucleotide polymorphism rs1625649 had prognostic impact on patients with *MGMT* methylated glioblastoma

Chih-Yi Hsu<sup>1,2</sup>, Hsiang-Ling Ho<sup>1,2</sup>, Shih-Chieh Lin<sup>1,2</sup>, Tiffany Dai-Hwa Ho<sup>3</sup>, Donald Ming-Tak Ho<sup>1,2,4\*</sup>

**1** Department of Pathology and Laboratory Medicine, Taipei Veterans General Hospital, Taipei, Taiwan, **2** School of Medicine, National Yang-Ming University, Taipei, Taiwan, **3** Department of Computer Science and Department of Statistics, Duke University, Durham, United States of America, **4** Department of Pathology and Laboratory Medicine, Cheng Hsin General Hospital, Taipei, Taiwan

\* [mtho11728@gmail.com](mailto:mtho11728@gmail.com)

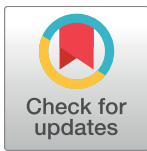

**OPEN ACCESS**

**Citation:** Hsu C-Y, Ho H-L, Lin S-C, Ho TD-H, Ho DM-T (2017) The *MGMT* promoter single-nucleotide polymorphism rs1625649 had prognostic impact on patients with *MGMT* methylated glioblastoma. PLoS ONE 12(10): e0186430. <https://doi.org/10.1371/journal.pone.0186430>

**Editor:** Dajun Deng, Beijing Cancer Hospital, CHINA

**Received:** May 26, 2017

**Accepted:** September 29, 2017

**Published:** October 16, 2017

**Copyright:** © 2017 Hsu et al. This is an open access article distributed under the terms of the [Creative Commons Attribution License](https://creativecommons.org/licenses/by/4.0/), which permits unrestricted use, distribution, and reproduction in any medium, provided the original author and source are credited.

**Data Availability Statement:** All relevant data are within the paper and its Supporting Information files.

**Funding:** The authors CYH and DMH received funding from " Taipei Veterans General Hospital, Grant Number: V104C-187, V105C-185, V105C-187 (<https://www.vghtpe.gov.tw/Index.action>)"; and from "The Ministry of Science and Technology, Executive Yuan, R.O.C., Grant Number: MOST 104-2320-B-075-003, MOST 104-2320-B-075-004 (<https://www.most.gov.tw/>)". The funders had no

## Abstract

Promoter methylation is the most significant mechanism to regulate O<sup>6</sup>-methylguanine-DNA-methyltransferase (*MGMT*) expression. Single-nucleotide polymorphisms (SNPs) in the *MGMT* promoter region may also play a role. The aim of this study was to evaluate the clinical significance of SNPs in the *MGMT* promoter region of glioblastoma. Genomic DNAs from 118 glioblastomas were collected for polymerase chain reaction (PCR) amplification. Sanger sequencing was used to sequence the *MGMT* promoter region to detect SNPs. The results were correlated with *MGMT* status and patient survival. Rs1625649 was the only polymorphic SNP located at the *MGMT* promoter region in 37.5% of glioblastomas. Homozygous rs1625649 (AA genotype) was correlated with a higher *MGMT* methylation level and a lower protein expression, but the result was not statistically significant. In patients with *MGMT* methylated glioblastoma, cases with homozygous rs1625649 (AA genotype) were significantly associated with a lack of *MGMT* protein expression and a better progression-free survival (PFS) than the cases with wild type rs1625649 (CC genotype) or heterozygous rs1625649 (CA genotype). The survival impact was significant in multivariate analyses. In conclusion, the *MGMT* promoter homozygous rs1625649 (AA genotype) was found to correlate with a better PFS in patients with *MGMT* methylated glioblastoma.

## Introduction

The combined usage of radiotherapy and temozolomide (TMZ) to treat glioblastoma (GBM) patients has improved the 2-year survival rate from 10.9% (radiotherapy alone) to 27.2% [1]. Similar improvements have also been observed in our institute: the 2-year survival rates of patients in the pre-TMZ era (1995–1999) and the TMZ era (2007/10–2011/08) were 10.5% and 25.6%, respectively. Methylation of the O<sup>6</sup>-methylguanine-DNA-methyltransferase (*MGMT*)

role in study design, data collection and analysis, decision to publish, or preparation of the manuscript.

**Competing interests:** The authors have declared that no competing interests exist.

gene promoter is the major prognostic factor for longer survival; it is also predictive of the benefit from TMZ chemotherapy [2]. *MGMT* genetic changes [3, 4], histone modifications [5, 6], p53 derangement [7, 8] and post-transcriptional regulation [9, 10] could also lead to *MGMT* silencing.

In our previous studies, the *MGMT* status tested using immunohistochemistry (IHC), methylation-specific PCR (MSP), quantitative real-time MSP (qMSP), and/or pyrosequencing all showed significant correlation with TMZ treatment response and patient survival [11–13]. However, the methylation status did not match with protein expression in 16.3% (15/92) of the cases [11]. This discrepancy could be due to mechanisms other than promoter methylation that control *MGMT* expression, such as *MGMT* genetic polymorphism.

Polymorphisms in the *MGMT* gene may affect the primary structure, expression and DNA repair activity of *MGMT* [14]. A meta-analysis suggested that Leu84Phe and Ile143Val in the *MGMT* gene are risk factors for cancer [15]. Although their functional/biological significance are not clear, several single-nucleotide polymorphisms (SNPs) exist in the *MGMT* promoter region [16]. Some important observations were made: rs1625649 was associated with allelic expression imbalance [17] and rs16906252 *MGMT* promoter SNP was associated with *MGMT* promoter methylation [18–21] and longer survival in GBM patients [20, 21]. Contrary to these observations, a study of cell lines showed rs16906252 increased *MGMT* transcription [22].

In this study, we intended to evaluate the clinical significance of SNP in the *MGMT* promoter region. We sequenced the *MGMT* promoter region to detect SNPs in a group of GBMs. The results of SNPs were correlated with *MGMT* status, clinical characteristics and the survival of patients.

## Materials and methods

### Patients

The study protocol was approved by the Institutional Review Board of Taipei Veterans General Hospital, Taiwan, R.O.C. (#2015-01-003BC). One hundred and eighteen (118) primary GBM patients who had received TMZ chemotherapy with concomitant radiotherapy were selected from the surgical pathology file of the Department of Pathology and Laboratory Medicine, Taipei Veterans General Hospital, Taiwan, from October, 2007 to September, 2013. The general data of the patients, including age, gender, Karnofsky performance status (KPS), date of surgery, extent of resection, history of radiotherapy and medication were retrieved from their medical records. A 25% or more increase in size of enhancing tumor or any new tumor on magnetic resonance imaging (MRI) was considered as progression according to the Macdonald criteria [23]. The results of the IHC assessing the *MGMT* protein expression and the qMSP analyzing the methylation level of *MGMT* promoter were from a previous study of ours [24]. A positive *MGMT* staining (IHC+) was defined to be the staining intensity of the majority of tumor cells similar to that of the adjacent endothelial cells [11]. Because the 0.1 cutoff is the most distinguishing point correlated with survival, samples with *MGMT* qMSP methylation level >0.1 were classified as positive [24]. qMSP is a quantitative assay and its sensitivity (0.6%) is better than that of pyrosequencing (~5%). It evaluates more CpG sites (9) than pyrosequencing does (4). For each patient, the original histopathology slides were reviewed to confirm the diagnosis. Appropriate section and tumor area were selected for SNP analysis. The data and samples were analyzed anonymously after a coding procedure.

### Genotyping for the *MGMT* promoter region SNP

The *MGMT* promoter region is located at chromosome 10q26 (chromosome position 131264447–131265603). Genomic DNA was isolated from paraffin-embedded tissue using the

PicoPure DNA extraction kit (Applied Biosystems, Foster City, CA, USA). The BIOMED-2 protocol was used to screen the quality and amplifiability of the isolated DNA [25]. DNA was PCR-amplified using the primers listed in S1 Table. Sanger sequencing was performed on the PCR product to detect SNPs.

## PCR amplification and direct sequencing of *IDH1* and *IDH2*

The data of the R132H-mutant *IDH1* IHC were from a previous study of ours [24]. *IDH1* sequencing was performed on 114 GBMs, 8 of which were IHC-positive and 106 of which were IHC-negative. *IDH2* sequencing was done on all the 55 *IDH1*-wildtype GBM, of which 47 patients were <55 years of age and 8 patients were  $\geq 55$  years of age.

The genomic regions containing the catalytic domain of *IDH1*, including codon 132, and of *IDH2*, including codon 172, were amplified by PCR with the annealing temperature at 60°C. Primers used for PCR amplification were listed as follows: *IDH1* forward primer 5' -GTTG GCGTCAAATGTGCCAC-3' and reverse primer 5' -GCCAACATGACTTACTTGATCC-3'; *IDH2* forward primer 5' -AGCCCATCATCTGCAAAAAC-3' and reverse primer 5' -CTAG GCGAGGAGCTCCAGT-3'. The polymerase chain reaction (PCR) amplicons were subjected to Sanger sequencing using the Genetic Analyzer 310 (Applied Biosystems, Foster City, CA, USA), and subsequently analyzed by Mutation Surveyor software V3.00 (Soft-Genetics, State College, PA).

## Statistical analysis

The Fisher's exact test or chi square test was used to compare the distribution of categorical variables. Differences in continuous variables were compared by Mann-Whitney or Kruskal-Wallis test. Progression-free survival (PFS) was measured from the date of surgery to the date of progression. Overall survival (OS) was measured from the date of surgery to the date of death or last follow-up. PFS and OS curves were plotted using Kaplan-Meier method, and their differences were calculated with the log-rank test. Cox regression model was used to adjust the influence of age, gender, KPS, extent of resection, bevacizumab treatment, and *IDH1* status. *P*-values were derived from 2-tailed tests and  $P < 0.05$  was considered significant.

## Results

### SNP of *MGMT* promoter region

Rs1625649 was the only polymorphic SNP found in the *MGMT* promoter region, with the rest being homozygous for the common allele. It occurred in 44 (37.3%) cases, 27 (22.9%) were heterozygous genotype (CA) and 17 (14.4%) were homozygous genotype (AA). No other polymorphic SNP was found, including rs16906252 identified by previous studies [20, 21].

### Correlation with *MGMT* status and clinical characteristics

The *MGMT* status and patients' clinical characteristics stratified by rs1625649 genotypes are listed in Table 1, with the details listed in S2 Table. Except for *IDH1* R132H mutation, there was no other *IDH1* mutation or *IDH2* mutation. Despite not reaching statistical significance, GBMs with homozygous rs1625649 (AA genotype) had a higher *MGMT* methylation level, lower frequency of *MGMT* protein expression, as well as better PFS and OS than those with heterozygous rs1625649 (CA genotype) and those with wild type rs1625649 (CC genotype). Of the *MGMT* methylated tumors, AA genotype had a higher mean methylation level (23.56) than CA (3.44) and CC (8.90) genotype ( $P = 0.074$ , Table 2). The *MGMT* protein expression in

**Table 1. Association between rs1625649 genotypes, MGMT status and clinical characteristics.**

|                       | Total          | rs1625649 genotypes |                |                  | P     |
|-----------------------|----------------|---------------------|----------------|------------------|-------|
|                       |                | CC                  | CA             | AA               |       |
| Number of patients    | 118            | 74                  | 27             | 17               |       |
| MGMT qMSP value       | 4.7 (2.4, 6.9) | 4.3 (1.5, 7.1)      | 1.5 (0.4, 2.7) | 11.1 (0.7, 21.5) | 0.816 |
| MGMT qMSP+ (>0.1)     | 56 (47.5%)     | 36 (48.7%)          | 12 (44.4%)     | 8 (47.1%)        | 0.932 |
| MGMT IHC+             | 55 (46.6%)     | 33 (44.6%)          | 17 (63.0%)     | 5 (29.4%)        | 0.080 |
| Age ≥ 50 years        | 73 (61.9%)     | 49 (66.2%)          | 14 (51.9%)     | 10 (58.8%)       | 0.405 |
| Male gender           | 71 (60.2%)     | 42 (56.8%)          | 18 (66.7%)     | 11 (64.7%)       | 0.612 |
| KPS ≥ 80              | 65 (55.1%)     | 37 (50.0%)          | 18 (66.7%)     | 10 (58.8%)       | 0.311 |
| Gross total resection | 97 (82.2%)     | 59 (79.7%)          | 23 (85.2%)     | 15 (88.2%)       | 0.639 |
| Bevacizumab treatment | 26 (22.0%)     | 15 (20.3%)          | 8 (29.6%)      | 3 (17.7%)        | 0.540 |
| IDH1 IHC+             | 10 (8.5%)      | 7 (9.5%)            | 1 (3.7%)       | 2 (11.8%)        | 0.571 |
| IDH1 R132H mutation   | 8/114 (7.0%)   | 6/71 (8.5%)         | 1/27 (3.7%)    | 1/16 (6.3%)      | 0.707 |
| Median PFS (months)   | 7.5            | 7.4                 | 7.0            | 13.5             | 0.098 |
| Median OS (months)    | 18.0           | 17.2                | 19.4           | 24.6             | 0.238 |

Data presented as N (%) or mean (95% confidence interval).

qMSP, quantitative methylation specific PCR; KPS, Karnofsky performance status; IDH1, isocitrate dehydrogenase 1; IHC, immunohistochemistry; PFS, progression-free survival; OS, overall survival.

<https://doi.org/10.1371/journal.pone.0186430.t001>

the methylated tumors (qMSP+) was significantly different among rs1625649 genotypes ( $P = 0.039$ , Table 2), and it was entirely absent in those with homozygous rs1625649 (AA genotype; 0%).

### Correlation with survivals

Among the patients with MGMT methylated GBM, those with homozygous rs1625649 (AA genotype) had longer PFS than those with heterozygous (CA genotype) or wild type (CC genotype) rs1625649 (Fig 1). The correlation remained statistically significant after the adjustment of age, gender, KPS, extent of resection, bevacizumab treatment and IDH1 status in multivariate analyses (Table 3). There was a similar trend in the OS, but their differences were not significant.

**Table 2. Association between rs1625649 genotypes and MGMT status subgrouped by promoter methylation (qMSP) and protein expression (IHC).**

| MGMT status     |      | Total              | rs1625649 genotypes |                  |                     | P     |
|-----------------|------|--------------------|---------------------|------------------|---------------------|-------|
| qMSP            | IHC  |                    | CC                  | CA               | AA                  |       |
| Positive (>0.1) |      | 56 (100%)          | 36 (100%)           | 12 (100%)        | 8 (100%)            |       |
| Mean (95% CI)   |      | 9.82 (5.33, 14.32) | 8.90 (3.43, 14.37)  | 3.44 (1.18, 5.7) | 23.56 (3.16, 43.96) | 0.074 |
|                 | IHC+ | 7 (12.5%)          | 3 (8.3%)            | 4 (33.3%)        | 0 (0%)              | 0.039 |
|                 | IHC- | 49 (87.5%)         | 33 (91.7%)          | 8 (66.7%)        | 8 (100%)            |       |
| Negative (≤0.1) |      | 62 (100%)          | 38 (100%)           | 15 (100%)        | 9 (100%)            |       |
| Mean (95% CI)   |      | 0.01 (0, 0.01)     | 0.01 (0, 0.01)      | 0.01 (0, 0.02)   | 0 (0, 0.01)         | 0.709 |
|                 | IHC+ | 48 (77.4%)         | 30 (79.0%)          | 13 (86.7%)       | 5 (55.6%)           | 0.197 |
|                 | IHC- | 14 (22.6%)         | 8 (21.1%)           | 2 (13.3%)        | 4 (44.4%)           |       |

Data presented as N (%) or mean (95% confidence interval).

qMSP, quantitative real-time methylation specific PCR; IHC, immunohistochemistry.

<https://doi.org/10.1371/journal.pone.0186430.t002>

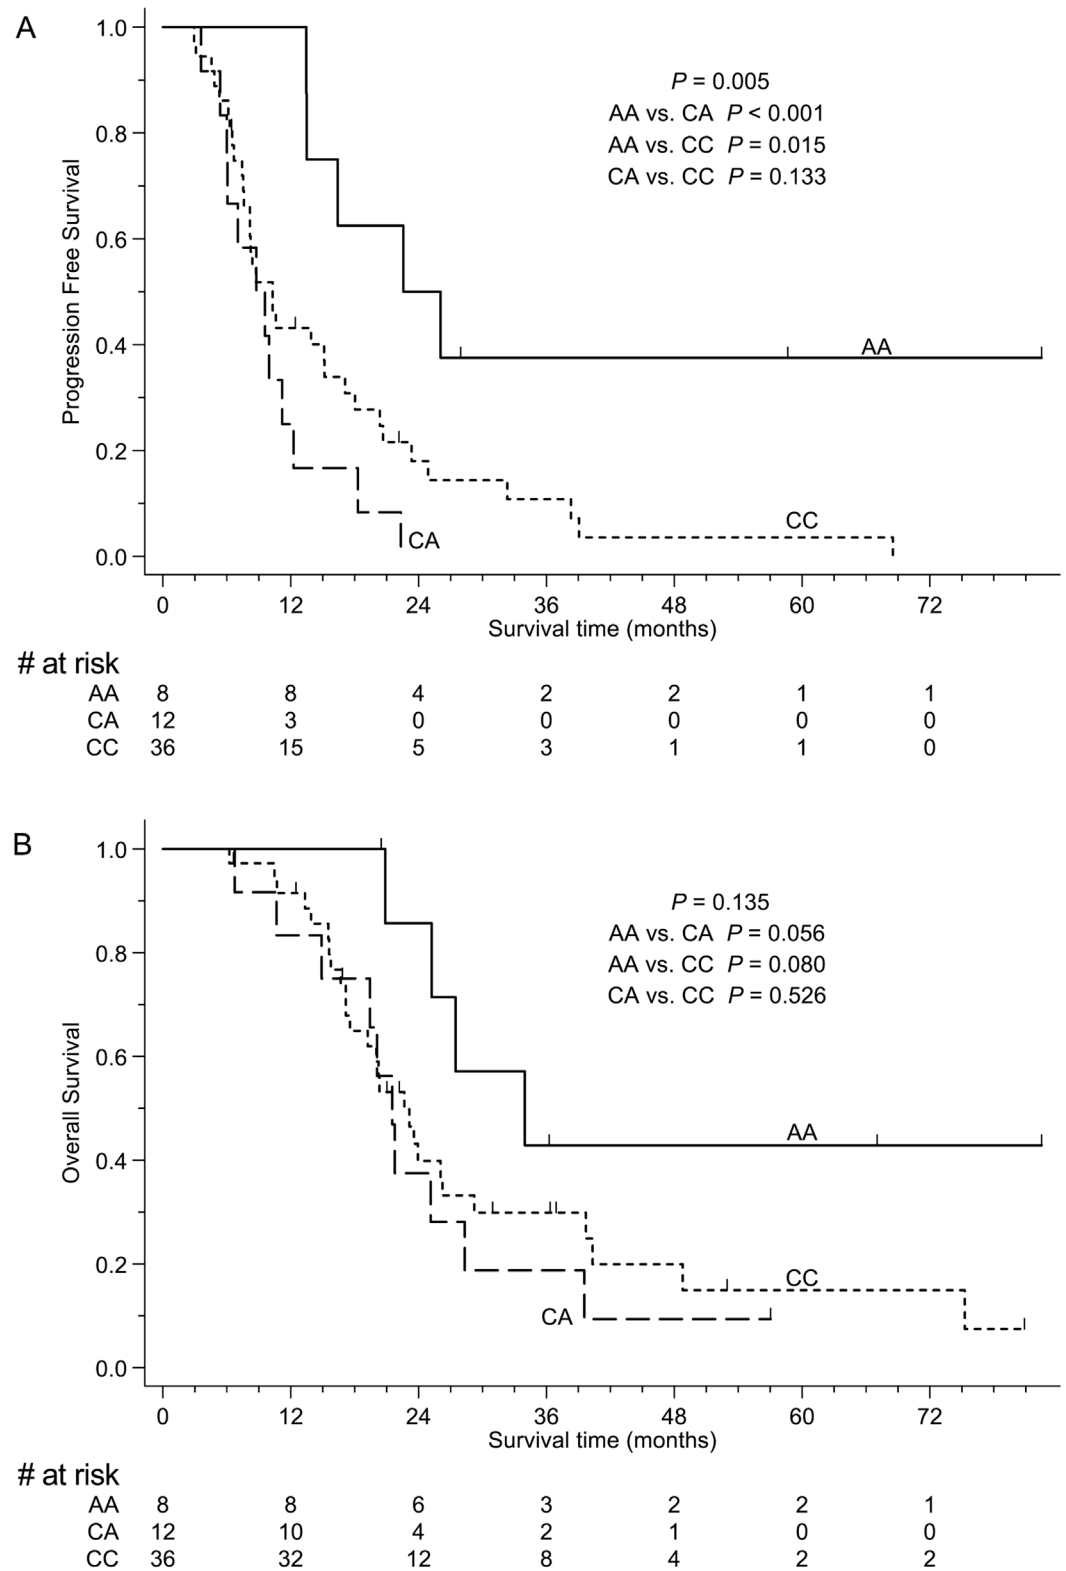

**Fig 1. Survival curves stratified by rs1625649 genotypes in patients with *MGMT* methylated GBM.** (A) Progression-free survival and (B) overall survival of the study cohort. Patients with homozygous rs1625649 (AA genotype) had longer progression-free survival than those with heterozygous (CA genotype) or wild type (CC genotype) rs1625649. However, the difference in overall survival did not reach statistical significance.

<https://doi.org/10.1371/journal.pone.0186430.g001>

**Table 3. Multivariate analyses of progression-free survival and overall survival stratified by rs1625649 genotypes in patients with *MGMT* methylated glioblastoma.**

| Genotype | N  | Progression-free survival | Overall survival |
|----------|----|---------------------------|------------------|
| CC       | 36 | 2.876 (0.050)             | 2.195 (0.189)    |
| CA       | 12 | 5.835 (0.003)             | 3.328 (0.063)    |
| AA       | 8  | 1 (reference)             | 1 (reference)    |

Data presented as Hazard Ratio (*P*). The influences of age, sex, Karnofsky performance status, extent of resection, bevacizumab treatment, and IDH1 status are adjusted.

<https://doi.org/10.1371/journal.pone.0186430.t003>

## Discussion

This study showed that rs1625649 was the only polymorphic SNP in the promoter region of *MGMT* in Taiwanese GBM cases. The global minor allele frequency of rs1625649 in the dbSNP database is 0.403; its clinical significance is not available. In a study of lung cancer risk, rs1625649 appeared to have an additive interaction with smoking, and it was one of the four factors included in the best model of lung cancer risk [26]. A meta-analysis including 2504 cancer cases and 3494 controls revealed no significant association between rs1625649 and overall cancer risks [15].

SNPs in regulatory non-coding regions can influence DNA helical conformations, transcript splicing, protein binding, and the methylation status of CpG dinucleotides [27]. In a cell line study, rs1625649 alone could downregulate the *MGMT* promoter activity in the transfected glioblastoma cells [16]. In a study of 169 lung adenocarcinomas, rs1625649 was found to be modestly associated with *MGMT* methylation [28]. In our study of GBMs, despite not being statistically significant, there was an association between homozygous rs1625649 (AA genotype) and higher *MGMT* methylation level and lower *MGMT* protein expression (Table 1). Our observations are consistent with the results of previous studies [16, 28]. In the methylated cases, the *MGMT* protein expression had statistically significant correlations with the genotype, among which was an association between a complete absence of protein expression and the AA genotype (Table 2;  $P = 0.039$ ). The correlation suggests that the homozygous (AA) genotype of rs1625649 had an enhancing effect on the lack of protein expression when methylation was present. On the other hand, the genotypes of the SNP did not have any significant effect on protein expression ( $P = 0.197$ ) in the absence of methylation. The better PFS in cases with AA genotype could be interpreted as a consequence of the absence of *MGMT* protein expression, which was related to better response to TMZ treatment. The fact that better OS in cases with AA genotype did not reach statistical significance could be attributed to the small sample size. Given that *MGMT* promoter methylation is a clinically relevant predictor of TMZ chemotherapy and that the effect of rs1625649 on *MGMT* protein expression is related to the promoter methylation status, the assessment of SNP could be combined with the assessment of *MGMT* methylation for clinical use. Since *MGMT* protein expression was completely absent in the *MGMT* methylated cases with rs1625649 homozygous genotype (AA), a better TMZ chemotherapeutic response could be expected. As a result, TMZ monotherapy could be a treatment option for patients who have *MGMT* methylated tumor(s) with AA genotype and cannot receive radiotherapy.

Different from our study cohort, a study of 49 cases of grade III and IV gliomas did not show prognostic significance of rs1625649 [29]. The prognostic information of rs1625649 in *MGMT* methylated gliomas was, however, not provided [29]. In a study of metastatic colorectal cancer treated with oxaliplatin-based chemotherapy, homozygous rs1625649 (AA

genotype) was associated with a worse PFS [30]. Further studies including more cases with similar tumor and treatment are needed to elucidate this issue.

Rs16906252 has been associated with *MGMT* promoter methylation [18–21]. The global minor allele frequency of rs16906252 is 0.025 in the dbSNP database. However, this SNP was mostly reported from the Western countries [18–21], and it has not been reported from the East Asian countries. It was also not found in our GBM cases. By comparing the protein expression level of the haplotypes with rs1625649 alone and that of the haplotypes with rs1625649 plus rs16906252, Xu et al. suggested that rs16906252 did not play a key role in the reduction of *MGMT* promoter activity [16].

In conclusion, rs1625649 was the only polymorphic SNP located in the *MGMT* promoter region in 37.5% of Taiwanese GBM cases. Among the patients with *MGMT* methylated GBM, those with homozygous rs1625649 (AA genotype) were associated with a lack of *MGMT* protein expression and a better PFS.

## Supporting information

**S1 Table. Primers for the single-nucleotide polymorphisms (SNPs) at *MGMT* promoter region.**

(PDF)

**S2 Table. Clinico-pathological features of the analyzed patients.**

(PDF)

## Acknowledgments

The authors thank Miss Wen-Yu Hsieh and Miss Chun-An Kuo for their technical assistance.

## Author Contributions

**Conceptualization:** Chih-Yi Hsu, Donald Ming-Tak Ho.

**Data curation:** Chih-Yi Hsu.

**Formal analysis:** Chih-Yi Hsu.

**Funding acquisition:** Chih-Yi Hsu, Donald Ming-Tak Ho.

**Investigation:** Chih-Yi Hsu, Hsiang-Ling Ho, Shih-Chieh Lin, Tiffany Dai-Hwa Ho, Donald Ming-Tak Ho.

**Methodology:** Chih-Yi Hsu, Hsiang-Ling Ho, Donald Ming-Tak Ho.

**Project administration:** Donald Ming-Tak Ho.

**Resources:** Chih-Yi Hsu, Hsiang-Ling Ho, Donald Ming-Tak Ho.

**Supervision:** Donald Ming-Tak Ho.

**Validation:** Chih-Yi Hsu, Hsiang-Ling Ho, Donald Ming-Tak Ho.

**Visualization:** Chih-Yi Hsu, Donald Ming-Tak Ho.

**Writing – original draft:** Chih-Yi Hsu.

**Writing – review & editing:** Chih-Yi Hsu, Hsiang-Ling Ho, Shih-Chieh Lin, Tiffany Dai-Hwa Ho, Donald Ming-Tak Ho.

## Reference

1. Stupp R, Hegi ME, Mason WP, van den Bent MJ, Taphoorn MJ, Janzer RC, et al. Effects of radiotherapy with concomitant and adjuvant temozolomide versus radiotherapy alone on survival in glioblastoma in a randomised phase III study: 5-year analysis of the EORTC-NCIC trial. *Lancet Oncol*. 2009; 10: 459–66. [https://doi.org/10.1016/S1470-2045\(09\)70025-7](https://doi.org/10.1016/S1470-2045(09)70025-7) PMID: 19269895.
2. Pegg AE, Dolan ME, Moschel RC. Structure, function, and inhibition of O<sup>6</sup>-alkylguanine-DNA alkyltransferase. *Prog Nucleic Acid Res Mol Biol*. 1995; 51: 167–223. PMID: 7659775.
3. Ramalho-Carvalho J, Pires M, Lisboa S, Graça I, Rocha P, Barros-Silva JD, et al. Altered expression of *MGMT* in high-grade gliomas results from the combined effect of epigenetic and genetic aberrations. *PLoS One*. 2013; 8: e58206. <https://doi.org/10.1371/journal.pone.0058206> PMID: 23505468
4. Imai Y, Oda H, Nakatsuru Y, Ishikawa T. A polymorphism at codon 160 of human O<sup>6</sup>-methylguanine-DNA methyltransferase gene in young patients with adult type cancers and functional assay. *Carcinogenesis*. 1995; 16: 2441–5. <https://doi.org/10.1093/carcin/16.10.2441> PMID: 7586149.
5. Zhao W, Soejima H, Higashimoto K, Nakagawachi T, Urano T, Kudo S, et al. The essential role of histone H3 Lys9 di-methylation and MeCP2 binding in *MGMT* silencing with poor DNA methylation of the promoter CpG island. *J Biochem*. 2005; 137: 431–40. <https://doi.org/10.1093/jb/mvi048> PMID: 15809347.
6. Kitange GJ, Mladek AC, Carlson BL, Schroeder MA, Pokorny JL, Cen L, et al. Inhibition of histone deacetylation potentiates the evolution of acquired temozolomide resistance linked to *MGMT* upregulation in glioblastoma xenografts. *Clin Cancer Res*. 2012; 18: 4070–9. <https://doi.org/10.1158/1078-0432.CCR-12-0560> PMID: 22675172.
7. Blough MD, Zlatescu MC, Cairncross JG. O<sup>6</sup>-methylguanine-DNA methyltransferase regulation by p53 in astrocytic cells. *Cancer Res*. 2007; 67: 580–4. <https://doi.org/10.1158/0008-5472.CAN-06-2782> PMID: 17234766.
8. Crone TM, Goodtzova K, Pegg AE. Amino acid residues affecting the activity and stability of human O<sup>6</sup>-alkylguanine-DNA alkyltransferase. *Mutat Res*. 1996; 363: 15–25. PMID: 8632775.
9. Kreth S, Limbeck E, Hinske LC, Schutz SV, Thon N, Hoefig K, et al. In human glioblastomas transcript elongation by alternative polyadenylation and miRNA targeting is a potent mechanism of *MGMT* silencing. *Acta Neuropathol*. 2013; 125: 671–81. <https://doi.org/10.1007/s00401-013-1081-1> PMID: 23340988.
10. Kushwaha D, Ramakrishnan V, Ng K, Steed T, Nguyen T, Futralan D, et al. A genome-wide miRNA screen revealed miR-603 as a *MGMT*-regulating miRNA in glioblastomas. *Oncotarget*. 2014; 5: 4026–39. <https://doi.org/10.18632/oncotarget.1974> PMID: 24994119.
11. Hsu CY, Lin SC, Ho HL, Chang-Chien YC, Hsu SP-C, Yen YS, et al. Exclusion of histiocytes/endothelial cells and using endothelial cells as internal reference are crucial for interpretation of *MGMT* immunohistochemistry in glioblastoma. *Am J Surg Pathol*. 2013; 37: 264–71. <https://doi.org/10.1097/PAS.0b013e318267b061> PMID: 23282970
12. Hsu CY, Ho HL, Lin SC, Chang-Chien YC, Chen MH, Hsu SP, et al. Comparative assessment of 4 methods to analyze *MGMT* status in a series of 121 glioblastoma patients. *Appl Immunohistochem Mol Morphol*. 2017; 25: 497–504. <https://doi.org/10.1097/PAI.0000000000000331> PMID: 27153440
13. Hsu CY, Ho HL, Chang-Chien YC, Chang YW, Ho DM. *MGMT* promoter methylation in non-neoplastic brain. *J Neurooncol*. 2015; 121: 459–67. <https://doi.org/10.1007/s11060-014-1663-3> PMID: 25391970
14. Zawlik I, Vaccarella S, Kita D, Mittelbronn M, Franceschi S, Ohgaki H. Promoter methylation and polymorphisms of the *MGMT* gene in glioblastomas: a population-based study. *Neuroepidemiology*. 2009; 32: 21–9. <https://doi.org/10.1159/000170088> PMID: 18997474.
15. Du L, Wang H, Xiong T, Ma Y, Yang J, Huang J, et al. The polymorphisms in the *MGMT* gene and the risk of cancer: a meta-analysis. *Tumour Biol*. 2013; 34: 3227–37. <https://doi.org/10.1007/s13277-013-0893-x> PMID: 23760981.
16. Xu M, Nekhayeva I, Cross CE, Rondelli CM, Wickliffe JK, Abdel-Rahman SZ. Influence of promoter/enhancer region haplotypes on *MGMT* transcriptional regulation: a potential biomarker for human sensitivity to alkylating agents. *Carcinogenesis*. 2014; 35: 564–71. <https://doi.org/10.1093/carcin/bgt355> PMID: 24163400.
17. Margison GP, Heighway J, Pearson S, McGown G, Thorncroft MR, Watson AJ, et al. Quantitative trait locus analysis reveals two intragenic sites that influence O<sup>6</sup>-alkylguanine-DNA alkyltransferase activity in peripheral blood mononuclear cells. *Carcinogenesis*. 2005; 26: 1473–80. <https://doi.org/10.1093/carcin/bgi087> PMID: 15831531.
18. Candiloro IL, Dobrovic A. Detection of *MGMT* promoter methylation in normal individuals is strongly associated with the T allele of the rs16906252 *MGMT* promoter single nucleotide polymorphism.



- Cancer Prev Res (Phila). 2009; 2: 862–7. <https://doi.org/10.1158/1940-6207.capr-09-0056> PMID: 19789298.
19. Kristensen LS, Nielsen HM, Hager H, Hansen LL. Methylation of *MGMT* in malignant pleural mesothelioma occurs in a subset of patients and is associated with the T allele of the rs16906252 *MGMT* promoter SNP. *Lung Cancer*. 2011; 71: 130–6. <https://doi.org/10.1016/j.lungcan.2010.05.008> PMID: 20627446.
  20. McDonald KL, Rapkins RW, Olivier J, Zhao L, Nozue K, Lu D, et al. The T genotype of the *MGMT*C>T (rs16906252) enhancer single-nucleotide polymorphism (SNP) is associated with promoter methylation and longer survival in glioblastoma patients. *Eur J Cancer*. 2013; 49: 360–8. <https://doi.org/10.1016/j.ejca.2012.08.012> PMID: 22975219.
  21. Rapkins RW, Wang F, Nguyen HN, Cloughesy TF, Lai A, Ha W, et al. The *MGMT* promoter SNP rs16906252 is a risk factor for *MGMT* methylation in glioblastoma and is predictive of response to temozolomide. *Neuro Oncol*. 2015; 17: 1589–98. <https://doi.org/10.1093/neuonc/nov064> PMID: 25910840.
  22. Krzesniak M, Butkiewicz D, Samojedny A, Chorazy M, Rusin M. Polymorphisms in *TDG* and *MGMT* genes—epidemiological and functional study in lung cancer patients from Poland. *Ann Hum Genet*. 2004; 68: 300–12. <https://doi.org/10.1046/j.1529-8817.2004.00079.x> PMID: 15225156.
  23. Macdonald DR, Cascino TL, Schold SC Jr., Cairncross JG. Response criteria for phase II studies of supratentorial malignant glioma. *J Clin Oncol*. 1990; 8: 1277–80. <http://dx.doi.org/10.1200/JCO.1990.8.7.1277>. PMID: 2358840.
  24. Hsu CY, Ho HL, Lin SC, Chang-Chien YC, Chen MH, Hsu SP, et al. Prognosis of glioblastoma with faint *MGMT* methylation-specific PCR product. *J Neurooncol*. 2015; 122: 179–88. <https://doi.org/10.1007/s11060-014-1701-1> PMID: 25575938
  25. van Dongen JJ, Langerak AW, Bruggemann M, Evans PA, Hummel M, Lavender FL, et al. Design and standardization of PCR primers and protocols for detection of clonal immunoglobulin and T-cell receptor gene recombinations in suspect lymphoproliferations: report of the BIOMED-2 Concerted Action BMH4-CT98-3936. *Leukemia*. 2003; 17: 2257–317. <https://doi.org/10.1038/sj.leu.2403202> PMID: 14671650.
  26. Hu Z, Wang H, Shao M, Jin G, Sun W, Wang Y, et al. Genetic variants in *MGMT* and risk of lung cancer in Southeastern Chinese: a haplotype-based analysis. *Hum Mutat*. 2007; 28: 431–40. <https://doi.org/10.1002/humu.20462> PMID: 17285603.
  27. Iatsyshyna AP, Pidpala OV, Lukash LL. *MGMT* expression: insights into its regulation. *Biopolym Cell*. 2013; 29: 367–74. <https://doi.org/10.7124/bc.00082B>
  28. Leng S, Bernauer AM, Hong C, Do KC, Yingling CM, Flores KG, et al. The A/G allele of rs16906252 predicts for *MGMT* methylation and is selectively silenced in premalignant lesions from smokers and in lung adenocarcinomas. *Clin Cancer Res*. 2011; 17: 2014–23. <https://doi.org/10.1158/1078-0432.CCR-10-3026> PMID: 21355081.
  29. Fogli A, Chautard E, Vaurs-Barriere C, Pereira B, Muller-Barthelemy M, Court F, et al. The tumoral A genotype of the *MGMT* rs34180180 single-nucleotide polymorphism in aggressive gliomas is associated with shorter patients' survival. *Carcinogenesis*. 2016; 37: 169–76. <https://doi.org/10.1093/carcin/bgv251> PMID: 26717998.
  30. Park JH, Kim NS, Park JY, Chae YS, Kim JG, Sohn SK, et al. *MGMT* –535G>T polymorphism is associated with prognosis for patients with metastatic colorectal cancer treated with oxaliplatin-based chemotherapy. *J Cancer Res Clin Oncol*. 2010; 136: 1135–42. <https://doi.org/10.1007/s00432-010-0760-8> PMID: 20091185.
